# Supplementary material
Source: ML conference proceedings conference paper supplement (https://openreview.net/forum?id=BnzMjDLs5e9)
Supplement: supplementary_material [file attachment]

# Noisy $\ell^0$ -Sparse Subspace Clustering on Dimensionality Reduced Data Supplementary Material

Yingzhen Yang

School of Computing and Augmented Intelligence  
Arizona State University  
699 S Mill Ave. Tempe, AZ 85281, USA  
yingzhen.yang@asu.edu

Ping Li

Cognitive Computing Lab  
Baidu Research  
10900 NE 8th ST. Bellevue, WA 98004, USA  
pingli98@gmail.com

## 1 PROOFS

We provide proofs to the lemmas and theorems in the paper in this subsection.  $\square$

### 1.1 LEMMA 1.1 AND ITS PROOF

**Lemma 1.1.** (Subspace detection property holds for noiseless  $\ell^0$ -SSC under the deterministic model) It can be verified that the following statement is true. Under the deterministic model, suppose data is noiseless,  $n_k \geq d_k + 1$ ,  $\mathbf{Y}^{(k)}$  is in general position. If all the data points in  $\mathbf{Y}^{(k)}$  are away from the external subspaces for any  $1 \leq k \leq K$ , then the subspace detection property for  $\ell^0$ -SSC holds with an optimal solution  $\mathbf{Z}^*$  to (3).

*Proof.* Let  $\mathbf{x}_i \in \mathcal{S}_k$ . Note that  $\mathbf{Z}^{*i}$  is an optimal solution to the following  $\ell^0$  sparse representation problem

$$\min_{\mathbf{Z}^i} \|\mathbf{Z}^i\|_0 \quad \text{s.t. } \mathbf{x}_i = [\mathbf{X}^{(k)} \setminus \mathbf{x}_i \quad \mathbf{X}^{(-k)}] \mathbf{Z}^i, \quad \mathbf{Z}_{ii} = 0,$$

where  $\mathbf{X}^{(-k)}$  denotes the data that lie in all subspaces except  $\mathcal{S}_k$ . Let  $\mathbf{Z}^{*i} = \begin{bmatrix} \alpha \\ \beta \end{bmatrix}$  where  $\alpha$  and  $\beta$  are sparse codes corresponding to  $\mathbf{X}^{(k)} \setminus \mathbf{x}_i$  and  $\mathbf{X}^{(-k)}$  respectively.

Suppose  $\beta \neq \mathbf{0}$ , then  $\mathbf{x}_i$  belongs to a subspace  $\mathcal{S}' = \mathbf{H}_{\mathbf{X}_{\mathbf{Z}^{*i}}}$  spanned by the projected data points corresponding to nonzero elements of  $\mathbf{Z}^{*i}$ , and  $\mathcal{S}' \neq \mathcal{S}_k$ ,  $\dim[\mathcal{S}'] \leq d_k$ . To see this, if  $\mathcal{S}' = \mathcal{S}_k$ , then the data corresponding to nonzero elements of  $\beta$  belong to  $\mathcal{S}_k$ , which is contrary to the definition of  $\mathbf{X}^{(-k)}$ . Also, if  $\dim[\mathcal{S}'] > d_k$ , then any  $d_k$  points in  $\mathbf{X}^{(k)}$  can be used to linearly represent  $\mathbf{x}_i$  by the condition of general position, contradicting with the optimality of  $\mathbf{Z}^{*i}$ . Since the data points (or columns) in  $\mathbf{X}_{\mathbf{Z}^{*i}}$  are linearly independent, it follows that  $\mathbf{x}_i$  lies in an external subspace  $\mathbf{H}_{\mathbf{X}_{\mathbf{Z}^{*i}}}$  spanned by linearly independent points in  $\mathbf{X}_{\mathbf{Z}^{*i}}$ , and  $\dim[\mathbf{H}_{\mathbf{X}_{\mathbf{Z}^{*i}}}] = \dim[\mathcal{S}'] \leq d_k$ . This contradicts with the assumption that  $\mathbf{x}_i$  is away from the external subspaces. Therefore,  $\beta = \mathbf{0}$ . Perform the above analysis for

all  $1 \leq i \leq n$ , we can prove that the subspace detection property holds for all  $1 \leq i \leq n$ .  $\square$

### 1.2 PROOF OF THEOREM 3.1

Before proving this theorem, we introduce the following perturbation bound for the distance between a data point and the subspaces spanned by noisy and noiseless data, which is useful to establish the conditions when the subspace detection property holds for noisy  $\ell^0$ -SSC.

**Lemma 1.2.** Let  $\beta \in \mathbb{R}^n$  and  $\mathbf{Y}_\beta$  has full column rank. Suppose  $\delta < \bar{\sigma}_{\mathbf{Y},r}$  where  $r = \|\beta\|_0$ , then  $\mathbf{X}_\beta$  is a full column rank matrix, and

$$|d(\mathbf{x}_i, \mathbf{H}_{\mathbf{X}_\beta}) - d(\mathbf{x}_i, \mathbf{H}_{\mathbf{Y}_\beta})| \leq \frac{\delta}{\bar{\sigma}_{\mathbf{Y},r} - \delta} \quad (1)$$

for any  $1 \leq i \leq n$ .

Lemma 1.3 shows that an optimal solution to the noisy  $\ell^0$ -SSC problem (5) is also that to a  $\ell^0$ -minimization problem with tolerance to noise.

**Lemma 1.3.** Let nonzero vector  $\beta^*$  be an optimal solution to the noisy  $\ell^0$ -SSC problem (5) for point  $\mathbf{x}_i$  with  $\|\beta^*\|_0 = r^* > 1$ . If  $\lambda > \tau_0$  where  $\tau_0$  is defined as

$$\tau_0 := \frac{2\delta\sqrt{r^*}}{\sigma_{\mathbf{X}}^*} + \tau_1,$$

where

$$\tau_1 := \frac{\delta}{\bar{\sigma}_{\mathbf{Y}}^* - \delta}, \quad \sigma_{\mathbf{X}}^* := \sigma_{\min}(\mathbf{X}_{\beta^*}),$$

with  $\delta < \bar{\sigma}_{\mathbf{Y}}^*$ , and  $\bar{\sigma}_{\mathbf{Y}}^*$  is defined as

$$\bar{\sigma}_{\mathbf{Y}}^* := \min_{r \in [r^*]} \bar{\sigma}_{\mathbf{Y},r},$$

then  $\beta^*$  is an optimal solution to the following sparse approximation problem with the uncorrupted data as the dictionary:

$$\min_{\beta} \|\beta\|_0 \quad \text{s.t.} \quad \|\mathbf{x}_i - \mathbf{Y}\beta\|_2 \leq c^* + \frac{2\delta\sqrt{r^*}}{\sigma_{\mathbf{X}}^*}, \quad \beta_i = 0, \quad (2)$$

where  $c^* := \|\mathbf{x}_i - \mathbf{X}\beta^*\|_2$ .

Now we are ready to prove Theorem 3.1.

**Proof of Theorem 3.1.** We first show that  $d(\mathbf{x}_i, \mathcal{S}_k) \leq c^* + \frac{2\delta\sqrt{r^*}}{\sigma_{\mathbf{X}}^*}$ . To see this,  $\sigma_{\mathbf{X}}^* = \sigma_{\min}(\mathbf{X}\beta^*) \leq 1$  as the columns of  $\mathbf{X}$  have unit  $\ell^2$ -norm. It follows that

$$c^* + \frac{2\delta\sqrt{r^*}}{\sigma_{\mathbf{X}}^*} \geq 2\delta\sqrt{r^*} \geq 2\delta > \|\mathbf{x}_i - \mathbf{y}_i\| \geq d(\mathbf{x}_i, \mathcal{S}_k).$$

By Lemma 1.3, it can be verified that  $\beta^*$  is an optimal solution to the following problem

$$\min_{\beta} \|\beta\|_0 \quad \text{s.t.} \quad \|\mathbf{x}_i - \mathbf{Y}\beta\|_2 \leq c^* + \frac{2\delta\sqrt{r^*}}{\sigma_{\mathbf{X}}^*}, \quad \beta_i = 0. \quad (3)$$

Let  $\mathbf{x}'$  be the projection of  $\mathbf{x}_i$  onto  $\mathbf{H}_{\overline{\mathbf{Y}^{(i)}}}$ , and let the columns of  $\overline{\mathbf{Y}^{(i)}}$  have column indices  $\mathbf{I}$  in  $\mathbf{Y}^{(k)}$ , that is,  $\mathbf{Y}_{\mathbf{I}}^{(k)} = \overline{\mathbf{Y}^{(i)}}$ . Then there exists  $\beta' \in \mathbb{R}^n$  and  $\beta'_j = 0$  for all  $j \notin \mathbf{I}$  such that  $\mathbf{x}' = \mathbf{Y}\beta'$  and  $\|\beta'\|_0 \leq r^*$ . It is clear that  $\beta'$  is a feasible solution to (3) because  $d(\mathbf{x}_i, \mathbf{H}_{\overline{\mathbf{Y}^{(i)}}}) = \|\mathbf{x}_i - \mathbf{Y}\beta'\|_2 \leq c^* + \frac{2\delta\sqrt{r^*}}{\sigma_{\mathbf{X}}^*}$  and it satisfies SDP for  $\mathbf{x}_i$ .

Suppose that there is an optimal solution  $\beta''$  to (3) which does not satisfy SDP for  $\mathbf{x}_i$ , then  $\|\beta''\|_0 \leq r^*$ . Then the subspace spanned by  $\mathbf{Y}\beta''$ ,  $\mathbf{H}_{\mathbf{Y}\beta''}$ , is an external subspace of  $\mathbf{y}_i$  and  $\mathbf{H}_{\mathbf{Y}\beta''} \in \mathcal{H}_{\mathbf{y}_i, r^*}$ , and it follows that  $d(\mathbf{x}_i, \mathbf{H}_{\mathbf{Y}\beta''}) > c^* + \frac{2\delta\sqrt{r^*}}{\sigma_{\mathbf{X}}^*}$ . However, since  $\beta''$  is a feasible solution,  $d(\mathbf{x}_i, \mathbf{H}_{\mathbf{Y}\beta''}) \leq c^* + \frac{2\delta\sqrt{r^*}}{\sigma_{\mathbf{X}}^*}$ . This contradiction shows that every optimal solution to the noisy  $\ell^0$ -SSC problem (5) satisfies SDP for  $\mathbf{x}_i$ .  $\square$

### 1.3 PROOF OF LEMMA 1.2

The following lemma is used for proving Lemma 1.2.

**Lemma 1.4.** (Perturbation of distance to subspaces) Let  $\mathbf{A}, \mathbf{B} \in \mathbb{R}^{m \times n}$  are two matrices and  $\text{rank}(\mathbf{A}) = r$ ,  $\text{rank}(\mathbf{B}) = s$ . Also,  $\mathbf{E} = \mathbf{A} - \mathbf{B}$  and  $\|\mathbf{E}\|_2 \leq C$ , where  $\|\cdot\|_2$  indicates the spectral norm. Then for any point  $\mathbf{x} \in \mathbb{R}^m$ , the difference of the distance of  $\mathbf{x}$  to the column space of  $\mathbf{A}$  and  $\mathbf{B}$ , i.e.  $|d(\mathbf{x}, \mathbf{H}_{\mathbf{A}}) - d(\mathbf{x}, \mathbf{H}_{\mathbf{B}})|$ , is bounded by

$$|d(\mathbf{x}, \mathbf{H}_{\mathbf{A}}) - d(\mathbf{x}, \mathbf{H}_{\mathbf{B}})| \leq \frac{C\|\mathbf{x}\|_2}{\min\{\sigma_r(\mathbf{A}), \sigma_s(\mathbf{B})\}}.$$

*Proof.* Note that the projection of  $\mathbf{x}$  onto the subspace  $\mathbf{H}_{\mathbf{A}}$  is  $\mathbf{A}\mathbf{A}^+\mathbf{x}$  where  $\mathbf{A}^+$  is the Moore-Penrose pseudo-inverse of the matrix  $\mathbf{A}$ , so  $d(\mathbf{x}, \mathbf{H}_{\mathbf{A}})$  equals to the distance between  $\mathbf{x}$  and its projection, namely  $d(\mathbf{x}, \mathbf{H}_{\mathbf{A}}) = \|\mathbf{x} - \mathbf{A}\mathbf{A}^+\mathbf{x}\|_2$ . Similarly,  $d(\mathbf{x}, \mathbf{H}_{\mathbf{B}}) = \|\mathbf{x} - \mathbf{B}\mathbf{B}^+\mathbf{x}\|_2$ .

It follows that

$$\begin{aligned} |d(\mathbf{x}, \mathbf{H}_{\mathbf{A}}) - d(\mathbf{x}, \mathbf{H}_{\mathbf{B}})| &= \|\mathbf{x} - \mathbf{A}\mathbf{A}^+\mathbf{x}\|_2 - \|\mathbf{x} - \mathbf{B}\mathbf{B}^+\mathbf{x}\|_2 \\ &\leq \|\mathbf{A}\mathbf{A}^+\mathbf{x} - \mathbf{B}\mathbf{B}^+\mathbf{x}\|_2 \leq \|\mathbf{A}\mathbf{A}^+ - \mathbf{B}\mathbf{B}^+\|_2 \|\mathbf{x}\|_2. \end{aligned} \quad (4)$$

According to the perturbation bound on the orthogonal projection in Chen et al. [2016], Stewart [1977],

$$\|\mathbf{A}\mathbf{A}^+ - \mathbf{B}\mathbf{B}^+\|_2 \leq \max\{\|\mathbf{E}\mathbf{A}^+\|_2, \|\mathbf{E}\mathbf{B}^+\|_2\}. \quad (5)$$

Since  $\|\mathbf{E}\mathbf{A}^+\|_2 \leq \|\mathbf{E}\|_2 \|\mathbf{A}^+\|_2 \leq \frac{C}{\sigma_r(\mathbf{A})}$ ,  $\|\mathbf{E}\mathbf{B}^+\|_2 \leq \|\mathbf{E}\|_2 \|\mathbf{B}^+\|_2 \leq \frac{C}{\sigma_s(\mathbf{B})}$ , combining (4) and (5), we have

$$\begin{aligned} |d(\mathbf{x}, \mathbf{H}_{\mathbf{A}}) - d(\mathbf{x}, \mathbf{H}_{\mathbf{B}})| &\leq \max\left\{\frac{C}{\sigma_r(\mathbf{A})}, \frac{C}{\sigma_s(\mathbf{B})}\right\} \|\mathbf{x}\|_2 \\ &= \frac{C\|\mathbf{x}\|_2}{\min\{\sigma_r(\mathbf{A}), \sigma_s(\mathbf{B})\}}. \end{aligned}$$

So that (1) is proved.  $\square$

**Proof of Lemma 1.2.** We have  $\mathbf{y}_i = \mathbf{x}_i - \mathbf{n}_i$ , and  $\sigma_{\min}(\mathbf{Y}_{\beta}^{\top} \mathbf{Y}_{\beta}) = (\sigma_{\min}(\mathbf{Y}_{\beta}))^2 \geq \sigma_{\mathbf{Y}, r}^2$ .

By Weyl [Weyl, 1912],  $|\sigma_i(\mathbf{Y}_{\beta}) - \sigma_i(\mathbf{X}_{\beta})| \leq \|\mathbf{N}_{\beta}\|_2 \leq \|\mathbf{N}_{\beta}\|_F \leq \sqrt{r}\delta$ . Since  $\sqrt{r}\delta < \sigma_{\mathbf{Y}, r} \leq \sigma_{\min}(\mathbf{Y}_{\beta}) \leq \sigma_i(\mathbf{Y}_{\beta})$ ,  $\sigma_i(\mathbf{X}_{\beta}) \geq \sigma_i(\mathbf{Y}_{\beta}) - \sqrt{r}\delta \geq \sigma_{\mathbf{Y}, r} - \sqrt{r}\delta > 0$  for  $1 \leq i \leq \min\{d, r\}$ . It follows that  $\sigma_{\min}(\mathbf{X}_{\beta}) \geq \sigma_{\mathbf{Y}, r} - \sqrt{r}\delta > 0$  and  $\mathbf{X}_{\beta}$  has full column rank.

Also,  $\|\mathbf{X}_{\beta} - \mathbf{Y}_{\beta}\|_2 \leq \|\mathbf{X}_{\beta} - \mathbf{Y}_{\beta}\|_F \leq \sqrt{r}\delta$ . According to Lemma 1.4,

$$\begin{aligned} |d(\mathbf{x}_i, \mathbf{H}_{\mathbf{X}_{\beta}}) - d(\mathbf{x}_i, \mathbf{H}_{\mathbf{Y}_{\beta}})| &\leq \frac{\sqrt{r}\delta}{\min\{\sigma_{\min}(\mathbf{X}_{\beta}), \sigma_{\min}(\mathbf{Y}_{\beta})\}} \\ &\leq \frac{\sqrt{r}\delta}{\sigma_{\mathbf{Y}, r} - \sqrt{r}\delta} = \frac{\delta}{\sigma_{\mathbf{Y}, r} - \delta}. \end{aligned}$$

$\square$

### 1.4 PROOF OF LEMMA 1.3

**Proof of Lemma 1.3.** We have

$$\begin{aligned} \|\mathbf{x}_i - \mathbf{X}\beta^*\|_2^2 + \lambda\|\beta^*\|_0 &\leq \|\mathbf{x}_i - \mathbf{X}\mathbf{0}\|_2^2 + \lambda\|\mathbf{0}\|_0 = 1 \\ \Rightarrow c^* = \|\mathbf{x}_i - \mathbf{X}\beta^*\|_2 &\leq \sqrt{1 - \lambda r^*} < 1. \end{aligned}$$

We first prove that  $\beta^*$  is an optimal solution to the sparse approximation problem

$$\min_{\beta} \|\beta\|_0 \quad \text{s.t.} \quad \|\mathbf{x}_i - \mathbf{X}\beta\|_2 \leq c^*, \quad \beta_i = 0. \quad (6)$$

To see this, if  $r^* = 1$ , then  $\beta^*$  must be an optimal solution to (6). If  $r^* > 1$ , suppose there is a vector  $\beta'$  such that  $\|\mathbf{x}_i - \mathbf{X}\beta'\|_2 \leq c^*$  and  $\|\beta'\|_0 < \|\beta^*\|_0$ , then  $L(\beta') < c^* + \lambda\|\beta^*\|_0 = L(\beta^*)$ , contradicting the fact that  $\beta^*$  is an optimal solution to (5).

Note that  $\mathbf{X}_{\beta^*}$  is a full column rank matrix, otherwise a sparser solution to (5) can be obtained as vector whose support corresponds to the maximal linear independent set of columns of  $\mathbf{X}_{\beta^*}$ .

Also, the distance between  $\mathbf{x}_i$  and the subspace spanned by columns of  $\mathbf{X}_{\beta^*}$  equals to  $c^*$ , i.e.  $d(\mathbf{x}_i, \mathbf{H}_{\mathbf{X}_{\beta^*}}) = c^*$ . To see this, it is clear that  $d(\mathbf{x}_i, \mathbf{H}_{\mathbf{X}_{\beta^*}}) \leq c^*$ . If there is a vector  $\mathbf{y} = \mathbf{X}\tilde{\beta}$  in  $\mathbf{H}_{\mathbf{X}_{\beta^*}}$  with  $\text{supp}(\tilde{\beta}) \subseteq \text{supp}(\beta^*)$ , and  $\|\mathbf{x}_i - \mathbf{y}\|_2 < c^*$ , then  $L(\tilde{\beta}) < L(\beta^*)$  which contradicts the optimality of  $\beta^*$ . Therefore,  $d(\mathbf{x}_i, \mathbf{H}_{\mathbf{X}_{\beta^*}}) \geq c^*$ , and it follows that  $d(\mathbf{x}_i, \mathbf{H}_{\mathbf{X}_{\beta^*}}) = c^*$ .

Since  $\|\mathbf{x}_i - \mathbf{X}\beta^*\|_2 \leq 1$ ,  $\|\mathbf{X}\beta^*\|_2 \leq 2$ . Also,

$$\sigma_{\min}(\mathbf{X}_{\beta^*}^\top \mathbf{X}_{\beta^*}) \|\beta^*\|_2^2 \leq \|\mathbf{X}\beta^*\|_2^2 \leq 4,$$

it follows that  $\|\beta^*\|_2 \leq \frac{4}{\sigma_{\mathbf{X}}^*}$ . By Cauchy-Schwarz inequality,  $\|\beta^*\|_1 \leq \frac{2\sqrt{r^*}}{\sigma_{\mathbf{X}}^*}$  and  $\|\mathbf{N}\beta^*\|_2 \leq \|\beta^*\|_1 \delta \leq \frac{2\delta\sqrt{r^*}}{\sigma_{\mathbf{X}}^*}$ . Therefore,

$$\begin{aligned} \|\mathbf{x}_i - \mathbf{Y}\beta^*\|_2 &= \|\mathbf{x}_i - \mathbf{X}\beta^* + \mathbf{N}\beta^*\|_2 \\ &\leq \|\mathbf{x}_i - \mathbf{X}\beta^*\|_2 + \|\mathbf{N}\beta^*\|_2 \leq c^* + \frac{2\delta\sqrt{r^*}}{\sigma_{\mathbf{X}}^*}, \end{aligned}$$

so that  $\beta^*$  is a feasible for problem (2).

To prove that  $\beta^*$  is an optimal solution to (2), we first note that  $\beta^*$  must be an optimal solution to (2) if  $r^* = 1$ . This is because  $c^* \leq \sqrt{1 - \lambda r^*} \leq 1 - \lambda$  and  $\lambda > \tau_0 > \frac{2\delta\sqrt{r^*}}{\sigma_{\mathbf{X}}^*}$  so that  $c^* + \frac{2\delta\sqrt{r^*}}{\sigma_{\mathbf{X}}^*} < 1$ , and it follows that  $\mathbf{0}$  is not feasible to (2).

If  $r^* > 1$  and suppose  $\beta^*$  is not an optimal solution to (2), then an optimal solution to (2) is a vector  $\beta'$  such that  $\|\mathbf{x}_i - \mathbf{Y}\beta'\|_2 \leq c^* + \frac{2\delta\sqrt{r^*}}{\sigma_{\mathbf{X}}^*}$  and  $\|\beta'\|_0 = r < r^*$ .  $\mathbf{Y}_{\beta'}$  is a full column rank matrix, otherwise a sparser solution can be obtained as vector whose support corresponds to the maximal linear independent set of columns of  $\mathbf{Y}_{\beta'}$ . We have

$$d(\mathbf{x}_i, \mathbf{H}_{\mathbf{Y}_{\beta'}}) \leq \|\mathbf{x}_i - \mathbf{Y}\beta'\|_2 \leq c^* + \frac{2\delta\sqrt{r^*}}{\sigma_{\mathbf{X}}^*}.$$

According to Lemma 1.2, we have

$$\begin{aligned} |d(\mathbf{x}_i, \mathbf{H}_{\mathbf{X}_{\beta'}}) - d(\mathbf{x}_i, \mathbf{H}_{\mathbf{Y}_{\beta'}})| &\leq \frac{\sqrt{r}\delta}{\sigma_{\mathbf{Y},r} - \sqrt{r}\delta} \\ &= \frac{\delta}{\bar{\sigma}_{\mathbf{Y},r} - \delta} \leq \frac{\delta}{\bar{\sigma}_{\mathbf{Y}}^* - \delta} \\ \Rightarrow d(\mathbf{x}_i, \mathbf{H}_{\mathbf{X}_{\beta'}}) &\leq c^* + \frac{2\delta\sqrt{r^*}}{\sigma_{\mathbf{X}}^*} + \frac{\delta}{\bar{\sigma}_{\mathbf{Y}}^* - \delta} = c^* + \tau_0. \end{aligned} \quad (7)$$

However, according to the optimality of  $\beta^*$  in the noisy  $\ell^0$ -SSC problem (5), we have

$$\begin{aligned} d(\mathbf{x}_i, \mathbf{H}_{\mathbf{X}_{\beta'}}) - c^* &= d(\mathbf{x}_i, \mathbf{H}_{\mathbf{X}_{\beta'}}) - d(\mathbf{x}_i, \mathbf{H}_{\mathbf{X}_{\beta^*}}) \\ &\stackrel{\textcircled{1}}{\geq} (r^* - r)\lambda > \tau_0. \end{aligned} \quad (8)$$

To see  $\textcircled{1}$  holds, let  $\beta'' \in \mathbb{R}^d$ ,  $\text{supp}(\beta'') \subseteq \text{supp}(\beta')$  such that  $\|\mathbf{x}_i - \mathbf{X}\beta''\|_2 = d(\mathbf{x}_i, \mathbf{H}_{\mathbf{X}_{\beta'}})$ . Then by the optimality of  $\beta^*$ ,

$$\begin{aligned} \|\mathbf{x}_i - \mathbf{X}\beta''\|_2 &\geq d(\mathbf{x}_i, \mathbf{H}_{\mathbf{X}_{\beta^*}}) + \lambda r^* - \lambda |\text{supp}(\beta'')| \\ &\geq d(\mathbf{x}_i, \mathbf{H}_{\mathbf{X}_{\beta^*}}) + (r^* - r)\lambda. \end{aligned}$$

The contradiction between (7) and (8) shows that  $\beta^*$  is an optimal solution to (2).  $\square$

## 1.5 PROOF OF THEOREM 3.3

Proof of Theorem 3.3. This theorem can be proved by checking that the conditions in Theorem 3.1 are satisfied.  $\square$

## 1.6 PROOF OF THEOREM 3.6

In order to prove this theorem, the following lemma is presented and it provides the geometric concentration inequality for the distance between a point  $\mathbf{y} \in \mathbf{Y}^{(k)}$  and any of its external subspaces. It renders a lower bound for  $M_i$ , namely the minimum distance between  $\mathbf{y}_i \in \mathcal{S}_k$  and its external subspaces.

**Lemma 1.5.** Under semi-random model, given  $1 \leq k \leq K$  and  $\mathbf{y} \in \mathbf{Y}^{(k)}$ , suppose  $\mathbf{H} \in \mathcal{H}_{\mathbf{y}_i, d_k}$  is any external subspace of  $\mathbf{y}$ . Moreover, assume that for any external subspace  $\mathbf{H}'$  of  $\mathbf{y}$ ,  $\text{Tr}(\mathbf{U}_{\mathbf{H}}^\top \mathbf{U}^{(k)} \mathbf{U}^{(k)\top} \mathbf{U}_{\mathbf{H}}) \leq d_k - 1$  where  $\mathbf{U}_{\mathbf{H}}$  is an orthonormal basis of  $\mathbf{H}$ . Then for any  $t > 0$ ,

$$\Pr[d(\mathbf{y}, \mathbf{H}) \geq \frac{1}{d_k} - 2t\sqrt{1 - \frac{1}{d_k}} - t^2] \geq 1 - 8\exp\left(-\frac{d_k t^2}{2}\right). \quad (9)$$

**Proof of Lemma 1.5.** Let  $\mathbf{H}$  be a fixed subspace of dimension  $d_e \leq d_k$ , and  $\mathbf{y} \notin \mathbf{H}$ . Since  $\mathbf{y} \in \mathcal{S}_k$  and  $\mathbf{y} \notin \mathbf{H}$ . Let  $\mathbf{y} = \mathbf{U}^{(k)} \tilde{\mathbf{y}}$  and  $\mathbb{E}[\tilde{\mathbf{y}} \tilde{\mathbf{y}}^\top] = \mathbf{I}_{d_k}$ .

Then the projection of  $\mathbf{y}$  onto  $\mathbf{H}$  is  $\mathbb{P}_{\mathbf{H}}(\mathbf{y}) = \mathbf{U}_{\mathbf{H}} \mathbf{U}_{\mathbf{H}}^\top \mathbf{y}$ , and we have

$$\begin{aligned} \mathbb{E}[\|\mathbb{P}_{\mathbf{H}}(\mathbf{y})\|_2^2] &= \mathbb{E}[\mathbf{y}^\top \mathbf{U}_{\mathbf{H}} \mathbf{U}_{\mathbf{H}}^\top \mathbf{U}_{\mathbf{H}} \mathbf{U}_{\mathbf{H}}^\top \mathbf{y}] \\ &= \mathbb{E}[\text{Tr}(\mathbf{y}^\top \mathbf{U}_{\mathbf{H}} \mathbf{U}_{\mathbf{H}}^\top \mathbf{y})] \\ &= \mathbb{E}[\text{Tr}(\mathbf{U}_{\mathbf{H}}^\top \mathbf{y} \mathbf{y}^\top \mathbf{U}_{\mathbf{H}})] \\ &= \text{Tr}(\mathbf{U}_{\mathbf{H}}^\top \mathbb{E}[\mathbf{y} \mathbf{y}^\top] \mathbf{U}_{\mathbf{H}}) \\ &= \text{Tr}(\mathbf{U}_{\mathbf{H}}^\top \mathbf{U}^{(k)} \mathbb{E}[\tilde{\mathbf{y}} \tilde{\mathbf{y}}^\top] \mathbf{U}^{(k)\top} \mathbf{U}_{\mathbf{H}}) \\ &= \frac{1}{d_k} \text{Tr}(\mathbf{U}_{\mathbf{H}}^\top \mathbf{U}^{(k)} \mathbf{U}^{(k)\top} \mathbf{U}_{\mathbf{H}}) \leq \frac{d_k - 1}{d_k} = 1 - \frac{1}{d_k}. \quad (10) \end{aligned}$$

According to the concentration inequality in section 5.2 of [Aubrun and Szarek, 2017], for any  $t > 0$ ,

$$\Pr[\|\mathbb{P}_{\mathbf{H}}(\mathbf{y})\|_2 - \mathbb{E}[\|\mathbb{P}_{\mathbf{H}}(\mathbf{y})\|_2] \geq t] \leq 8 \exp\left(-\frac{d_k t^2}{2}\right), \quad (11)$$

and by (10)  $\mathbb{E}[\|\mathbb{P}_{\mathbf{H}}(\mathbf{y})\|_2] \leq \sqrt{1 - \frac{1}{d_k}}$ .

Now let  $\mathbf{H}$  be spanned by data from  $\mathbf{Y}$ , i.e.  $\mathbf{H} = \mathbf{H}_{\{\mathbf{y}_{i_j}\}_{j=1}^{d_e}}$ , where  $\{\mathbf{y}_{i_j}\}_{j=1}^{d_e}$  are any  $d_e$  linearly independent points that does not contain  $\mathbf{y}$ . For any fixed points  $\{\mathbf{y}_{i_j}\}_{j=1}^{d_e}$ , (11) holds. Let  $A$  be the event that  $\|\mathbb{P}_{\mathbf{H}}(\mathbf{y}) - \mathbb{E}[\|\mathbb{P}_{\mathbf{H}}(\mathbf{y})\|_2]\| \geq t$ , we aim to integrate the indicator function  $\mathbb{1}_A$  with respect to the random vectors, i.e.  $\mathbf{y}$  and  $\{\mathbf{y}_{i_j}\}_{j=1}^{d_e}$ , to obtain the probability that  $A$  happens over these random vectors. Let  $\mathbf{y} = \mathbf{y}_i$ , using Fubini theorem, we have

$$\begin{aligned} \Pr[A] &= \int_{\otimes_{j=1}^{d_e} \mathcal{S}^{(j)}} \mathbb{1}_A \otimes_{j=1}^{d_e} d\mu^{(j)} \\ &= \int_{\otimes_{j \neq i} \mathcal{S}^{(j)}} \Pr[A|\{\mathbf{y}_j\}_{j \neq i}] \otimes_{j \neq i} d\mu^{(j)} \\ &\leq \int_{\otimes_{j \neq i} \mathcal{S}^{(j)}} 8 \exp\left(-\frac{d_k t^2}{2}\right) \otimes_{j \neq i} d\mu^{(j)} = 8 \exp\left(-\frac{d_k t^2}{2}\right), \quad (12) \end{aligned}$$

where  $\mathcal{S}^{(j)} \in \{\mathcal{S}_k\}_{k=1}^K$  is the subspace that  $\mathbf{y}_j$  lies in, and  $\mu^{(j)}$  is the probabilistic measure of the distribution in  $\mathcal{S}^{(j)}$ . The last inequality is due to (11).

Note that for any  $\mathbf{y}$ 's external subspace  $\mathbf{H} = \mathbf{H}_{\{\mathbf{y}_{i_j}\}_{j=1}^{d_e}}$ ,  $d(\mathbf{y}, \mathbf{H}) = \sqrt{\|\mathbf{y}\|_2^2 - \|\mathbb{P}_{\mathbf{H}}(\mathbf{y})\|_2^2} = \sqrt{1 - \|\mathbb{P}_{\mathbf{H}}(\mathbf{y})\|_2^2}$ . According to (12), we have

$$\Pr[d(\mathbf{y}, \mathbf{H}) \geq \frac{1}{d_k} - 2t\sqrt{1 - \frac{1}{d_k}} - t^2] \geq 1 - 8 \exp\left(-\frac{d_k t^2}{2}\right). \quad \square$$

The following lemma shows the lower bound for any submatrix of  $\mathbf{Y}^{(k)}$ .

**Lemma 1.6.** ([Laurent and Massart, 2000, Lemma 1]) Let  $\{X_i\}_{i=1}^k$  be i.i.d. standard Gaussian random variables and  $X = \sum_{i=1}^k X_i^2$ , then

$$\begin{aligned} \Pr[X - k \geq 2\sqrt{kx} + 2x] &\geq \exp(-x), \\ \Pr[k - X \geq 2\sqrt{kx}] &\geq \exp(-x). \end{aligned}$$

**Lemma 1.7.** (Spectrum bound for Gaussian random matrix, [Davidson and Szarek, 2001, Theorem II.13]) Suppose  $\mathbf{A} \in \mathbb{R}^{m \times n}$  ( $m \geq n$ ) is a random matrix whose entries are i.i.d. samples generated from the standard Gaussian distribution  $\mathcal{N}(0, \frac{1}{m})$ . Then

$$1 - \sqrt{\frac{n}{m}} \leq \mathbb{E}[\sigma_n(\mathbf{A})] \leq \mathbb{E}[\sigma_1(\mathbf{A})] \leq 1 + \sqrt{\frac{n}{m}}.$$

Also, for any  $t > 0$ ,

$$\begin{aligned} \Pr[\sigma_n(\mathbf{A}) \leq 1 - \sqrt{\frac{n}{m}} - t] &< \exp\left(-\frac{mt^2}{2}\right), \quad (13) \\ \Pr[\sigma_1(\mathbf{A}) \geq 1 + \sqrt{\frac{n}{m}} + t] &< \exp\left(-\frac{mt^2}{2}\right). \end{aligned}$$

**Lemma 1.8.** Let  $\mathbf{Y} \in \mathbb{R}^{d \times r}$  be any submatrix of  $\mathbf{Y}^{(k)}$  with  $\text{rank}(\mathbf{Y}) = r$  and  $r \leq r_0 \leq \lfloor \frac{1}{\lambda} \rfloor \leq d_k$ ,  $k \in [K]$ . Suppose  $c_1 > 0$  is an arbitrary small constant,  $\varepsilon_0, \varepsilon_1 > 0$  be small constants, and  $d_k$  is large enough such that  $2d_k^{-0.05} + 2d_k^{-0.1} \leq \varepsilon_0$  and  $\sqrt{\frac{1}{\lambda d_k}} + \sqrt{\frac{2}{\lambda d_k} \log \frac{en_k}{r_0}} \leq \varepsilon_1$ . Then with probability at least  $1 - \exp(-c_1 d_k) - 2n_k \exp(-d_k^{0.9})$ ,  $\sigma_{\min}(\mathbf{Y}) \geq \sigma'_{\min}$ , where  $\sigma'_{\min}$  is defined by (17).

*Proof.* Let  $\mathbf{Y} = \mathbf{U}^{(k)} \boldsymbol{\alpha} \mathbf{S}$  be a submatrix of size  $d_k \times r$  of  $\mathbf{Y}^{(k)}$ .  $\boldsymbol{\alpha} \in \mathbb{R}^{d_k \times r}$  and elements of  $\boldsymbol{\alpha}$  are i.i.d. standard Gaussians, that is,  $\alpha_{ij} \sim \mathcal{N}(0, 1)$ ,  $i \in [d_k]$ ,  $j \in [r]$ .  $\mathbf{S} \in \mathbb{R}^{r \times r}$  is a diagonal matrix with  $\mathbf{S}_{ii} = \|\boldsymbol{\alpha}^i\|_2$  for  $i \in [r]$ . Define  $\mathbf{C} := \boldsymbol{\alpha} \mathbf{S}$ . By the concentration property of  $\chi^2$ -distribution (Lemma 1.6), with probability at least  $1 - 2n_k \exp(-d_k^{0.9})$ ,  $\mathbf{S}_{ii} \in [\sqrt{d_k - 2d_k^{0.95}}, \sqrt{d_k + 2d_k^{0.95} + 2d_k^{0.9}}]$  for all  $i \in [r]$  and any submatrix  $\mathbf{Y}$  of  $\mathbf{Y}^{(k)}$ .

Now we estimate an lower bound for the least singular value of  $\boldsymbol{\alpha}$ . By (13) of Lemma 1.7, for a particular submatrix  $\mathbf{Y}$  of  $\mathbf{Y}^{(k)}$  and the corresponding  $\boldsymbol{\alpha}$  and any  $t > 0$ , we have

$$\Pr[\sigma_{\min}(\boldsymbol{\alpha}) \geq \sqrt{d_k} - \sqrt{r} - \sqrt{d_k t}] \geq 1 - \exp\left(-\frac{d_k t^2}{2}\right). \quad (14)$$

Now there are  $\binom{n_k}{r}$  ways of choosing the submatrix  $\mathbf{Y}$ , and  $\binom{n_k}{r} \leq \left(\frac{en_k}{r}\right)^r$ . Applying the union bound to (14), we have

$$\Pr[\sigma_{\min}(\boldsymbol{\alpha}) \geq \sqrt{d_k} - \sqrt{r} - \sqrt{d_k t}] \geq 1 - \binom{n_k}{r} \exp\left(-\frac{d_k t^2}{2}\right)$$

$$\geq 1 - \exp\left(r \log \frac{en_k}{r} - \frac{d_k t^2}{2}\right) \geq 1 - \exp\left(r_0 \log \frac{en_k}{r_0} - \frac{d_k t^2}{2}\right) \quad \mathbf{1.7 \text{ PROOF OF THEOREM 4.1}}$$

(15)

for any submatrix  $Y \in \mathbb{R}^{d_k \times r}$  of  $\mathbf{Y}^{(k)}$ . Let  $c_1 > 0$  and  $t = \frac{\sqrt{2r_0 \log \frac{en_k}{r_0}}}{\sqrt{d_k}} + \sqrt{c_1}$  in (15), then with probability at least  $1 - \exp\left(-\frac{c_1 d_k}{2}\right)$ ,  $\sigma_{\min}(\boldsymbol{\alpha}) \geq \sqrt{d_k}(1 - \sqrt{c_1}) - \sqrt{r} - \sqrt{2r_0 \log \frac{en_k}{r_0}}$ . Combined with the bounds for  $\mathbf{S}_{ii}$ , we conclude that with probability at least  $1 - \exp(-c_1 d_k) - 2n_k \exp(-d_k^{0.9})$ ,

$$\begin{aligned} \sigma_{\min}(\mathbf{Y}) = \sigma_{\min}(\boldsymbol{\alpha}\mathbf{S}) &\geq \frac{\sqrt{d_k}(1 - \sqrt{c_1}) - \sqrt{r} - \sqrt{2r_0 \log \frac{en_k}{r_0}}}{\sqrt{d_k + 2d_k^{0.95} + 2d_k^{0.9}}} \\ &\geq \frac{1}{1 + 2d_k^{-0.05} + 2d_k^{-0.1}} \left(1 - \sqrt{c_1} - \sqrt{\frac{r}{d_k}} - \sqrt{\frac{2r_0}{d_k} \log \frac{en_k}{r_0}}\right) \\ &\geq \frac{1}{1 + \varepsilon_0} (1 - \sqrt{c_1} - \varepsilon_1) = \sigma'_{\min}. \end{aligned}$$

□

**Proof of Theorem 3.6.** Let  $\mathbf{Y}_\beta$  for any  $\beta \in \mathbb{R}^n$  with  $\|\beta\|_0 = r_0$ . Noting that  $\mathbf{Y}_\beta$  have columns from at most  $r_0$  subspaces, let  $\beta = \sum_{r=1}^{r_0} \beta^{(r)}$ ,  $\{\beta^{(r)}\}_{r=1}^{r_0}$  have non-overlapping support, each  $\mathbf{Y}_{\beta^{(r)}}$  is a submatrix of  $\mathbf{Y}_\beta$  and columns of  $\mathbf{Y}_{\beta^{(r)}}$  are from the same subspace. For any  $\mathbf{u} \in \mathbb{R}^{r_0}$  with  $\|\mathbf{u}\|_2 = 1$ , we can write  $\mathbf{u}$  as  $\mathbf{u} = \sum_{r=1}^{r_0} \mathbf{u}^{(r)}$  where  $\{\mathbf{u}^{(r)}\}_{r=1}^{r_0}$  have non-overlapping support and  $\mathbf{u}^{(r)}$  corresponds to  $\mathbf{Y}_{\beta^{(r)}}$  for  $r \in [r_0]$ . With  $d_{\min}$  sufficiently large as specified in the conditions of this theorem, by Lemma 1.8,  $\sigma_{\min}(\mathbf{Y}_{\beta^{(r)}}) \geq \sigma'_{\min}$  for  $r \in [r_0]$ , where  $\sigma'_{\min}$  is defined by (17). Furthermore, define

$$\text{aff}_{\max} := \max_{t_1, t_2 \in [K]: t_1 \neq t_2} \text{aff}(\mathcal{S}_{t_1}, \mathcal{S}_{t_2}).$$

We then have

$$\begin{aligned} &\|\mathbf{Y}_\beta \mathbf{u}\|_2^2 \\ &= \sum_{r=1}^{r_0} \left\| \mathbf{Y}_{\beta^{(r)}} \mathbf{u}^{(r)} \right\|_2^2 + 2 \sum_{s, t \in [r_0]: s < t} \mathbf{u}^{(s)\top} \mathbf{Y}_{\beta^{(s)}}^\top \mathbf{Y}_{\beta^{(t)}} \mathbf{u}^{(t)} \\ &\geq \sigma_{\min}^{\prime 2} \|\mathbf{u}\|_2^2 - 2 \sum_{s, t \in [r_0]: s < t} \left\| \mathbf{u}^{(s)} \right\|_2 \left\| \mathbf{u}^{(t)} \right\|_2 \text{aff}_{\max} \\ &\geq (\sigma_{\min}^{\prime 2} - (r_0 - 1) \text{aff}_{\max}) \|\mathbf{u}\|_2^2 \\ &= \sigma_{\min}^{\prime 2} - (r_0 - 1) \text{aff}_{\max}. \end{aligned} \quad (16)$$

It follows that  $\sigma_{\min}(\mathbf{Y}_\beta) \geq \sigma_{\min}^{\prime 2} - (r_0 - 1) \text{aff}(\mathcal{S}_{t_1}, \mathcal{S}_{t_2})$ . By Weyl [Weyl, 1912],  $|\sigma_{\min}(\mathbf{X}_\beta) - \sigma_{\min}(\mathbf{Y}_\beta)| \leq \|\mathbf{N}_\beta\|_2 \leq \delta \sqrt{r_0}$ . Therefore, it follows by (16) that

$$\sigma_{\min}(\mathbf{X}_\beta) \geq \sigma_{\min}^{\prime 2} - (r_0 - 1) \text{aff}(\mathcal{S}_{t_1}, \mathcal{S}_{t_2}) - \delta \sqrt{r_0} > 0,$$

if  $\delta < \frac{\sigma_{\min}^{\prime 2} - (r_0 - 1) \text{aff}(\mathcal{S}_{t_1}, \mathcal{S}_{t_2})}{\sqrt{r_0}} = c$ . It can be verified that (20), (21) and (22) guarantee (12), (13) and (14) in Theorem 3.3 respectively, therefore, the conclusion holds. □

We need the following lemmas before presenting the proof of Theorem 4.1. Lemma 1.9 shows that the low rank approximation  $\tilde{\mathbf{X}}$  is close to  $\mathbf{X}$  in terms of the spectral norm [Halko et al., 2011]. Lemma 1.10 presents a perturbation bound for the distance between a data point and a subspace before and after the projection  $\mathbf{P}$ .

**Lemma 1.9.** (Corollary 10.9 in Halko et al. [2011]) Let  $p_0 \geq 2$  be an integer and  $p' = p - p_0 \geq 4$ , then with probability at least  $1 - 6e^{-p}$ , the spectral norm of  $\mathbf{X} - \tilde{\mathbf{X}}$  is bounded by

$$\|\mathbf{X} - \tilde{\mathbf{X}}\|_2 \leq C_{p, p_0},$$

where

$$C_{p, p_0} := \left(1 + 17\sqrt{1 + \frac{p_0}{p'}}\right) \sigma_{p_0+1} + \frac{8\sqrt{p}}{p'+1} \left(\sum_{j>p_0} \sigma_j^2\right)^{\frac{1}{2}}$$

and  $\sigma_1 \geq \sigma_2 \geq \dots$  are the singular values of  $\mathbf{X}$ .

**Lemma 1.10.** Let  $\beta \in \mathbb{R}^n$ ,  $\tilde{\mathbf{y}}_i = \mathbf{P}\mathbf{y}_i$ ,  $\mathbf{H}_{\mathbf{Y}_\beta}$  is an external subspace of  $\mathbf{y}_i$ ,  $\tilde{\mathbf{Y}}_\beta = \mathbf{P}(\mathbf{Y}_\beta)$  and  $\tilde{\mathbf{Y}}_\beta$  has full column rank. Then

$$\begin{aligned} &|d(\mathbf{y}_i, \mathbf{H}_{\mathbf{Y}_\beta}) - d(\tilde{\mathbf{y}}_i, \mathbf{H}_{\tilde{\mathbf{Y}}_\beta})| \\ &\leq C_{p, p_0} \left(1 + \frac{1}{\min_{1 \leq r \leq \tilde{d}_k} \sigma_{\mathbf{Y}, r} - C_{p, p_0} - 2\delta \sqrt{\tilde{d}_k}}\right) \end{aligned}$$

for any  $1 \leq i \leq n$  and  $\mathbf{y}_i \in \mathcal{S}_k$ .

*Proof.* This lemma can be proved by applying Lemma 1.4. □

**Proof of Theorem 4.1.** For any matrix  $\mathbf{A} \in \mathbb{R}^{p \times q}$ , we first show that multiplying  $\mathbf{Q}$  to the left of  $\mathbf{A}$  would not change its spectrum. To see this, let the singular value decomposition of  $\mathbf{A}$  be  $\mathbf{A} = \mathbf{U}_\mathbf{A} \boldsymbol{\Sigma} \mathbf{V}_\mathbf{A}^\top$  where  $\mathbf{U}_\mathbf{A}$  and  $\mathbf{V}_\mathbf{A}$  have orthonormal columns with  $\mathbf{U}_\mathbf{A}^\top \mathbf{U}_\mathbf{A} = \mathbf{V}_\mathbf{A}^\top \mathbf{V}_\mathbf{A} = \mathbf{I}$ . Then  $\mathbf{Q}\mathbf{A} = \mathbf{U}_{\mathbf{Q}\mathbf{A}} \boldsymbol{\Sigma} \mathbf{V}_{\mathbf{Q}\mathbf{A}}^\top$  is the singular value decomposition of  $\mathbf{Q}\mathbf{A}$  with  $\mathbf{U}_{\mathbf{Q}\mathbf{A}} = \mathbf{Q}\mathbf{U}_\mathbf{A}$  and  $\mathbf{V}_{\mathbf{Q}\mathbf{A}} = \mathbf{V}_\mathbf{A}$ . This is because the columns of  $\mathbf{U}_{\mathbf{Q}\mathbf{A}}$  are orthonormal since the columns  $\mathbf{Q}$  are orthonormal:  $\mathbf{U}_{\mathbf{Q}\mathbf{A}}^\top \mathbf{U}_{\mathbf{Q}\mathbf{A}} = \mathbf{U}_\mathbf{A}^\top \mathbf{Q}^\top \mathbf{Q} \mathbf{U}_\mathbf{A} = \mathbf{I}$ , and  $\boldsymbol{\Sigma}$  is a diagonal matrix with nonnegative diagonal elements. It follows that  $\sigma_{\min}(\mathbf{Q}\mathbf{A}) = \sigma_{\min}(\mathbf{A})$  for any  $\mathbf{A} \in \mathbb{R}^{p \times q}$ .

For a point  $\mathbf{x}_i = \mathbf{y}_i + \mathbf{n}_i$ , after projection via  $\mathbf{P}$ , we have the projected noise  $\tilde{\mathbf{n}}_i = \mathbf{P}\mathbf{n}_i$ . Because

$$\|\tilde{\mathbf{n}}_i\|_2 = \|\mathbf{P}\mathbf{n}_i\|_2 = \|\mathbf{Q}^\top \mathbf{n}_i\|_2 \leq \|\mathbf{Q}\|_2 \|\mathbf{n}_i\|_2 \leq \|\mathbf{n}_i\|_2 \leq \delta,$$

the magnitude of the noise in the projected data is also bounded by  $\delta$ . Also,

$$\|\tilde{\mathbf{x}}_i\|_2 = \|\mathbf{Q}^\top \mathbf{x}_i\|_2 \leq \|\mathbf{x}_i\|_2 \leq 1.$$

Let  $\beta \in \mathbb{R}^n$ ,  $\tilde{\mathbf{Y}}_\beta = \mathbf{P}\mathbf{Y}_\beta$  with  $\|\beta\|_0 = r$ . Since  $\sigma_{\min}(\mathbf{Q}\tilde{\mathbf{Y}}_\beta) = \sigma_{\min}(\tilde{\mathbf{Y}}_\beta)$ , we have

$$\begin{aligned} |\sigma_{\min}(\tilde{\mathbf{Y}}_\beta) - \sigma_{\min}(\mathbf{Y}_\beta)| &= |\sigma_{\min}(\mathbf{Q}\tilde{\mathbf{Y}}_\beta) - \sigma_{\min}(\mathbf{Y}_\beta)| \\ &\leq \|\mathbf{Q}\tilde{\mathbf{Y}}_\beta - \mathbf{Y}_\beta\|_2 \\ &= \|\mathbf{Q}\mathbf{Q}^\top \mathbf{Y}_\beta - \mathbf{Y}_\beta\|_2 \\ &= \|\mathbf{Q}\mathbf{Q}^\top \mathbf{X}_\beta - \mathbf{X}_\beta + \mathbf{N}_\beta - \mathbf{Q}\mathbf{Q}^\top \mathbf{N}_\beta\|_2 \\ &\leq C_{p,p_0} + \|\mathbf{N}_\beta\|_F + \|\mathbf{Q}\mathbf{Q}^\top \mathbf{N}_\beta\|_F \\ &\leq C_{p,p_0} + 2\delta\sqrt{r}. \end{aligned} \quad (17)$$

It follows from (17) that if

$$C_{p,p_0} + 2\delta\sqrt{\tilde{d}_{\max}} < \min_{k=1,\dots,K} \sigma_{\mathbf{Y}}^{(k)},$$

then  $\tilde{\mathbf{Y}}$  is also in general position.

In addition, since  $r_0 \leq \lfloor \frac{1}{\lambda} \rfloor$  and  $\lambda\|\tilde{\beta}^*\|_0 \leq L(\mathbf{0}) \leq 1$ , we have  $\|\tilde{\beta}^*\|_0 \leq r_0 \leq \lfloor \frac{1}{\lambda} \rfloor$ .

Based on (17) we have

$$|\bar{\sigma}_{\tilde{\mathbf{Y}},r} - \bar{\sigma}_{\mathbf{Y},r}| \leq C_{p,p_0} + 2\delta\sqrt{r_0}, \quad (18)$$

and it follows by (18) that  $\delta < \min_{1 \leq r < r_0} \bar{\sigma}_{\tilde{\mathbf{Y}},r}$  because  $\delta < \min_{1 \leq r < r_0} \bar{\sigma}_{\mathbf{Y},r} - C_{p,p_0} - 2\delta\sqrt{r_0}$ .

Again, for  $\beta \in \mathbb{R}^n$  with  $\|\beta\|_0 = r \leq r_0$ , we have

$$\begin{aligned} |\sigma_{\min}(\tilde{\mathbf{X}}_\beta) - \sigma_{\min}(\mathbf{X}_\beta)| &= |\sigma_{\min}(\mathbf{Q}\tilde{\mathbf{X}}_\beta) - \sigma_{\min}(\mathbf{X}_\beta)| \\ &\leq \|\mathbf{Q}\tilde{\mathbf{X}}_\beta - \mathbf{X}_\beta\|_2 \\ &= \|\mathbf{Q}\mathbf{Q}^\top \mathbf{X}_\beta - \mathbf{X}_\beta\|_2 = \|\hat{\mathbf{X}} - \mathbf{X}_\beta\|_2 \\ &\leq C_{p,p_0}. \end{aligned} \quad (19)$$

It can be verified by (19) that

$$|\sigma_{\tilde{\mathbf{X}},r} - \sigma_{\mathbf{X},r}| \leq C_{p,p_0}. \quad (20)$$

Combining (20), Lemma 1.10, and the known condition that

$$\begin{aligned} M_i - C_{p,p_0} \left(1 + \frac{1}{\min_{1 \leq r \leq \tilde{d}_k} \sigma_{\mathbf{Y},r} - C_{p,p_0} - 2\delta\sqrt{\tilde{d}_k}}\right) \\ > \delta + \frac{2\delta}{\sigma_{\mathbf{X},r_0} - C_{p,p_0}}, \end{aligned}$$

we have

$$\tilde{M}_{i,\delta} := \tilde{M}_i - \delta > \frac{2\delta}{\bar{\sigma}_{\tilde{\mathbf{X}},r_0}},$$

where  $\mathbf{y}_i \in \mathcal{S}_k$ .

Based on (18) and (20), we have

$$\tilde{\mu}_{r_0} < 1 - \frac{2\delta}{\sigma_{\tilde{\mathbf{X}},r_0}},$$

because

$$\begin{aligned} &\frac{\delta}{\min_{1 \leq r < r_0} \bar{\sigma}_{\mathbf{Y},r_0} - C_{p,p_0} - 2\delta\sqrt{r_0} - \delta} \\ &< 1 - \frac{2\delta}{\sigma_{\mathbf{X},r_0} - C_{p,p_0}}. \end{aligned}$$

□

## 1.8 PROOF OF THEOREM 4.2

Proof of Theorem 4.2. It can be verified that  $\tilde{M}_i \geq \frac{M_i}{1+\varepsilon}$ . Let  $\beta \in \mathbb{R}^n$ ,  $\tilde{\mathbf{Y}}_\beta = \mathbf{P}\mathbf{Y}_\beta$  with  $\|\beta\|_0 = r$  and  $\text{rank}(\mathbf{Y}_\beta) = r$ , then for any  $\mathbf{u} \in \mathbb{R}^r$ ,  $\|\tilde{\mathbf{Y}}_\beta \mathbf{u}\|_2 = \|\mathbf{P}\mathbf{Y}_\beta \mathbf{u}\|_2 \geq (1-\varepsilon)\|\mathbf{Y}_\beta \mathbf{u}\|_2 \geq (1-\varepsilon)\sigma_{\min}(\mathbf{Y}_\beta)\|\mathbf{u}\|_2$ . It follows that  $\sigma_{\min}(\tilde{\mathbf{Y}}_\beta) \geq (1-\varepsilon)\sigma_{\min}(\mathbf{Y}_\beta)$ , and  $\bar{\sigma}_{\tilde{\mathbf{Y}},r} \geq (1-\varepsilon)\bar{\sigma}_{\mathbf{Y},r}$ . Similarly,  $\sigma_{\min}(\tilde{\mathbf{X}}_\beta) \geq (1-\varepsilon)\sigma_{\min}(\mathbf{X}_\beta)$  for  $\beta \in \mathbb{R}^n$ ,  $\|\beta\|_0 = r$  and  $\text{rank}(\mathbf{X}_\beta) = r$ . It follows that  $\sigma_{\tilde{\mathbf{X}},r} \geq (1-\varepsilon)\sigma_{\mathbf{X},r}$ . Since (31)-(34) hold, the conditions (12)-(16) required by Theorem 3.3 on the projected data ( $\tilde{\mathbf{Y}}$  and  $\tilde{\mathbf{X}}$ ) also hold. Therefore, the subspace detection property holds with  $\tilde{\beta}^*$  for  $\tilde{\mathbf{x}}_i$  with probability at least  $1 - K\delta$  by the union bound when  $p \geq \frac{d^2+d}{\delta^r(2\varepsilon-\varepsilon^2)^2}$ . □

## 2 BOUND FOR SUBOPTIMAL AND GLOBALLY OPTIMAL SOLUTIONS FOR NOISY $\ell^0$ -SSC AND NOISY-DR- $\ell^0$ -SSC

While our theoretical analysis for noisy  $\ell^0$ -SSC and Noisy-DR- $\ell^0$ -SSC is based on optimal solution to the  $\ell^0$  regularized problem (5), in this subsection we prove that the bound for the suboptimal solution  $\hat{\beta}$  obtained by Algorithm 1 is in fact close to an optimal solution to (5), justifying the theoretical findings of noisy  $\ell^0$ -SSC and Noisy-DR- $\ell^0$ -SSC.

We further present the bound for the gap between  $\hat{\beta}$  and  $\beta^*$ ,  $\|\hat{\beta} - \beta^*\|_2$ , based on Theorem 5 in Yang and Yu [2019]. Let  $g(\beta) = \|\mathbf{x}_i - \mathbf{X}\beta\|_2^2$  and  $\beta^*$  be the globally optimal solution to (5),  $\mathbf{S}^* = \text{supp}(\beta^*)$ ,  $\hat{\beta}$  be the suboptimal solution to (5) obtained by PGD,  $\hat{\mathbf{S}} = \text{supp}(\hat{\beta})$ . The following theorem presents the bound for  $\|\hat{\beta} - \beta^*\|_2$ .

**Theorem 2.1.** (Theorem 5 in Yang and Yu [2019]) Suppose  $\mathbf{X}_{\text{SUS}^*}$  has full column rank with  $\kappa_0 := \sigma_{\min}(\mathbf{X}_{\text{SUS}^*}) > 0$  where  $\mathbf{S}$  is the support of the initialization for PGD on problem (5). Let  $\kappa > 0$  such that  $2\kappa_0^2 > \kappa$  and  $b$  is chosen according to (21) as below:

$$\begin{aligned} 0 < b < \min\left\{\min_{j \in \hat{\mathbf{S}}} |\hat{\beta}_j|, \frac{\lambda}{\max_{j \notin \hat{\mathbf{S}}} \left|\frac{\partial g}{\partial \beta_j}\right|_{\beta=\hat{\beta}}}\right\}, \\ \min_{j \in \mathbf{S}^*} |\beta_j^*|, \frac{\lambda}{\max_{j \notin \mathbf{S}^*} \left|\frac{\partial g}{\partial \beta_j}\right|_{\beta=\beta^*}} \}. \end{aligned} \quad (21)$$



Let  $\mathbf{F} = (\widehat{\mathbf{S}} \setminus \mathbf{S}^*) \cup (\mathbf{S}^* \setminus \widehat{\mathbf{S}})$  be the symmetric difference between  $\widehat{\mathbf{S}}$  and  $\mathbf{S}^*$ , then

$$\|\widehat{\boldsymbol{\beta}} - \boldsymbol{\beta}^*\|_2 \leq \frac{1}{2\kappa_0^2 - \kappa} \left( \sum_{j \in \mathbf{F} \cap \widehat{\mathbf{S}}} (\max\{0, \frac{\lambda}{b} - \kappa|\widehat{\boldsymbol{\beta}}_j - b|\})^2 + \sum_{j \in \mathbf{F} \setminus \widehat{\mathbf{S}}} (\max\{0, \frac{\lambda}{b} - \kappa b\})^2 \right)^{\frac{1}{2}}.$$

**Remark 2.2.** It is observed that the gap  $\|\widehat{\boldsymbol{\beta}} - \boldsymbol{\beta}^*\|_2$  is small when  $\frac{\lambda}{b} - \kappa|\widehat{\boldsymbol{\beta}}_j - b|$  for  $j \in \mathbf{F} \cap \widehat{\mathbf{S}}$  and  $\frac{\lambda}{b} - \kappa b$  are small. Based on this observation, Theorem 2.3 establishes the conditions under which  $\widehat{\boldsymbol{\beta}}$  is also an optimal solution to (5), i.e.  $\widehat{\boldsymbol{\beta}} = \boldsymbol{\beta}^*$ .

Define  $\mathbf{S}^* = \text{supp}(\boldsymbol{\beta}^*)$ ,  $H^* = \max_{1 \leq j \leq n} \text{dist}(\boldsymbol{\beta}, \mathbf{H}_{\mathbf{X}_{\mathbf{S}^* \setminus \{j\}}})$ ,  $\mu = \max\{H^* + \|\boldsymbol{\beta}_i - \mathbf{X}\boldsymbol{\beta}^*\|_2, 2\|\mathbf{x}_i - \mathbf{X}\widehat{\boldsymbol{\beta}}\|_2, 2\|\mathbf{x}_i - \mathbf{X}\boldsymbol{\beta}^*\|_2\}$ ,  $\kappa_0 = \sigma_{\min}(\mathbf{X}_{\mathbf{S} \cup \mathbf{S}^*}) > 0$  where  $\mathbf{S} = \text{supp}(\boldsymbol{\beta}^{(0)})$ . The following theorem demonstrates that  $\widehat{\boldsymbol{\beta}} = \boldsymbol{\beta}^*$  if  $\lambda$  is two-side bounded and  $\widehat{\boldsymbol{\beta}}_{\min} = \min_{t: \widehat{\boldsymbol{\beta}}_t \neq 0} |\widehat{\boldsymbol{\beta}}_t|$  is sufficiently large.

**Theorem 2.3.** (Conditions that the suboptimal solution by PGD is also globally optimal) If

$$\widehat{\boldsymbol{\beta}}_{\min} \geq \frac{\mu}{\kappa_0^2} \quad (22)$$

and

$$\frac{\mu^2}{2\kappa_0^2} \leq \lambda \leq (\widehat{\boldsymbol{\beta}}_{\min} - \frac{\mu}{2\kappa_0^2})\mu, \quad (23)$$

then  $\widehat{\boldsymbol{\beta}} = \boldsymbol{\beta}^*$ .

Sketch of Proof. It can be verified that  $\max\{0, \frac{\lambda}{b} - \kappa|\widehat{\boldsymbol{\beta}}_j - b|\} = 0$  and  $\max\{0, \frac{\lambda}{b} - \kappa b\} = 0$  under the conditions (22) and (23), therefore,  $\widehat{\boldsymbol{\beta}} = \boldsymbol{\beta}^*$  by applying Theorem 2.1.  $\square$

### 3 TIME COMPLEXITY OF NOISY $\ell^0$ -SSC, NOISY-DR- $\ell^0$ -SSC-LR, NOISY-DR- $\ell^0$ -SSC-CSP

The time complexity of running PGD by Algorithm 1 for noisy  $\ell^0$ -SSC is  $\mathcal{O}(Tnd)$ , where  $T$  is the maximum iteration number. The time complexity of running Algorithm 1 for Noisy-DR- $\ell^0$ -SSC-LR is comprised of two parts. The first part is the time complexity of steps 1-3 with matrix multiplication and QR decomposition, which is  $\mathcal{O}(dp^2 + pdn)$ . The second part is the time complexity of step 4, which is  $\mathcal{O}(Tnp)$ . The overall time complexity of Noisy-DR- $\ell^0$ -SSC is  $\mathcal{O}(dp^2 + pdn + Tnp)$ . In practice,  $p$  is much smaller than  $\min\{d, n, T\}$ , so Noisy-DR- $\ell^0$ -SSC-LR is more efficient

than noisy  $\ell^0$ -SSC. Noisy-DR- $\ell^0$ -SSC-CSP is even more efficient than both noisy  $\ell^0$ -SSC and Noisy-DR- $\ell^0$ -SSC, whose time complexity is  $\mathcal{O}(pdn + Tnp)$ . This is because the linear transformation  $\mathbf{P}$  obtained by CSP does require QR decomposition.

## 4 PROXIMAL GRADIENT DESCENT (PGD) FOR NOISY $\ell^0$ -SSC

Algorithm 1 describes how to perform Noisy-DR- $\ell^0$ -SSC-LR for data clustering. Note that Noisy-DR- $\ell^0$ -SSC performs noisy  $\ell^0$ -SSC on the dimensionality reduced data  $\widetilde{\mathbf{X}}$ . Proximal Gradient Descent (PGD) is employed to optimize the objective function of noisy  $\ell^0$ -SSC for every data point  $\mathbf{x}_i$ , which is described in Algorithm 1. In the  $k$ -th iteration of PGD for problem (5), the variable  $\boldsymbol{\beta}$  is updated according to

$$\boldsymbol{\beta}^{(k+1)} = T_{\sqrt{2\lambda s}}(\boldsymbol{\beta}^{(k)} - s\nabla g(\boldsymbol{\beta}^{(k)})),$$

where  $s$  is a positive step size,  $g(\boldsymbol{\beta}) = \|\mathbf{x}_i - \mathbf{X}\boldsymbol{\beta}\|_2^2$ ,  $T_\theta$  is an element-wise hard thresholding operator:

$$[T_\theta(\mathbf{u})]_j = \begin{cases} 0 & : |\mathbf{u}_j| \leq \theta \\ \mathbf{u}_j & : \text{otherwise} \end{cases}, \quad 1 \leq j \leq n.$$

It is proved in Yang et al. [2017] that the sequence  $\{\boldsymbol{\beta}^{(k)}\}$  generated by PGD converges to a critical point of (5).

---

**Algorithm 1** Proximal Gradient Descent (PGD) for noisy  $\ell^0$ -SSC problem (5)

---

**Input:**

The initialization  $\boldsymbol{\beta}^{(0)}$ , step size  $s > 0$ , parameter  $\lambda$ , maximum iteration number  $T$ , stopping threshold  $\varepsilon$ .

- 1: **for**  $1 \leq i \leq n$  **do**
- 2:  $\widetilde{\boldsymbol{\beta}}^{(i)} = \boldsymbol{\beta}^{(i-1)} - s\nabla g(\boldsymbol{\beta}^{(i-1)})$
- 3:  $\boldsymbol{\beta}^{(i)} = T_{\sqrt{2\lambda s}}(\widetilde{\boldsymbol{\beta}}^{(i)})$
- 4: **if**  $|L(\boldsymbol{\beta}^{(i)}) - L(\boldsymbol{\beta}^{(i-1)})| < \varepsilon$  **then**
- 5: **break**
- 6: **end if**
- 7: **end for**

**Output:**  $\widehat{\boldsymbol{\beta}}$  which is the suboptimal solution to (5)

---

## 5 ADDITIONAL EXPERIMENTAL RESULTS

We present more results of Noisy-DR- $\ell^0$ -SSC-LR and Noisy-DR- $\ell^0$ -SSC-CSP in Table 1 with different projection dimension  $p$ . Figure 1 show how the accuracy and NMI varies with respect to  $\lambda$  on the Extended Yale-B data set.

Figure 2a to Figure 2f illustrate SDP violation with respect to  $\lambda$  for different noise levels, justifying our theoretical finding that a large  $\lambda$  tends to preserve the subspace detection property for noisy  $\ell^0$ -SSC, Noisy-DR- $\ell^0$ -SSC-LR and Noisy-DR- $\ell^0$ -CSP.

Table 1: Clustering results on various data sets, with different values of  $p$  for the linear transformation  $\mathbf{P}$  and the best two results in bold

| Data Set | Measure | Noisy $\ell^0$ -SSC | Noisy-DR- $\ell^0$ -SSC-LR |                       |                       | Noisy-DR- $\ell^0$ -SSC-CSP |                       |                       |
|----------|---------|---------------------|----------------------------|-----------------------|-----------------------|-----------------------------|-----------------------|-----------------------|
|          |         |                     | $p = \min\{d, n\}/5$       | $p = \min\{d, n\}/10$ | $p = \min\{d, n\}/15$ | $p = \min\{d, n\}/5$        | $p = \min\{d, n\}/10$ | $p = \min\{d, n\}/15$ |
| COIL-20  | AC      | 0.8472              | 0.8479                     | 0.8479                | <b>0.8479</b>         | <b>0.8486</b>               | 0.8472                | 0.8472                |
|          | NMI     | 0.9428              | 0.9433                     | 0.9433                | <b>0.9433</b>         | <b>0.9439</b>               | 0.9428                | 0.9428                |
| COIL-100 | AC      | <b>0.7683</b>       | 0.6992                     | <b>0.7276</b>         | 0.7043                | <b>0.5404</b>               | 0.7046                | 0.7233                |
|          | NMI     | <b>0.9182</b>       | 0.8626                     | <b>0.8919</b>         | 0.8636                | 0.7819                      | 0.8708                | <b>0.8726</b>         |
| Yale-B   | AC      | <b>0.8480</b>       | 0.8219                     | 0.8231                | 0.8289                | <b>0.8500</b>               | 0.8318                | 0.8277                |
|          | NMI     | 0.8612              | 0.8519                     | 0.8527                | 0.8534                | 0.8538                      | <b>0.8593</b>         | <b>0.8594</b>         |

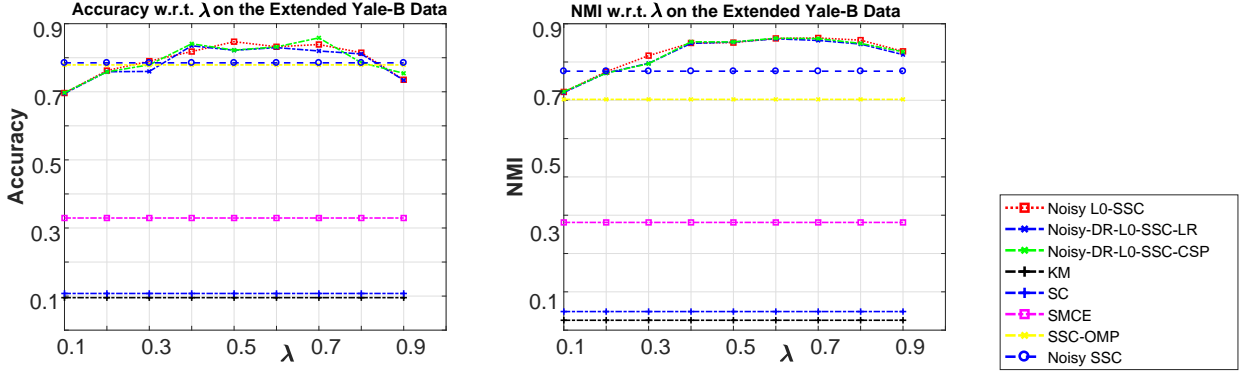

Figure 1: Accuracy (left) and NMI (right) with respect to different values of  $\lambda$  on the Extended Yale-B data set

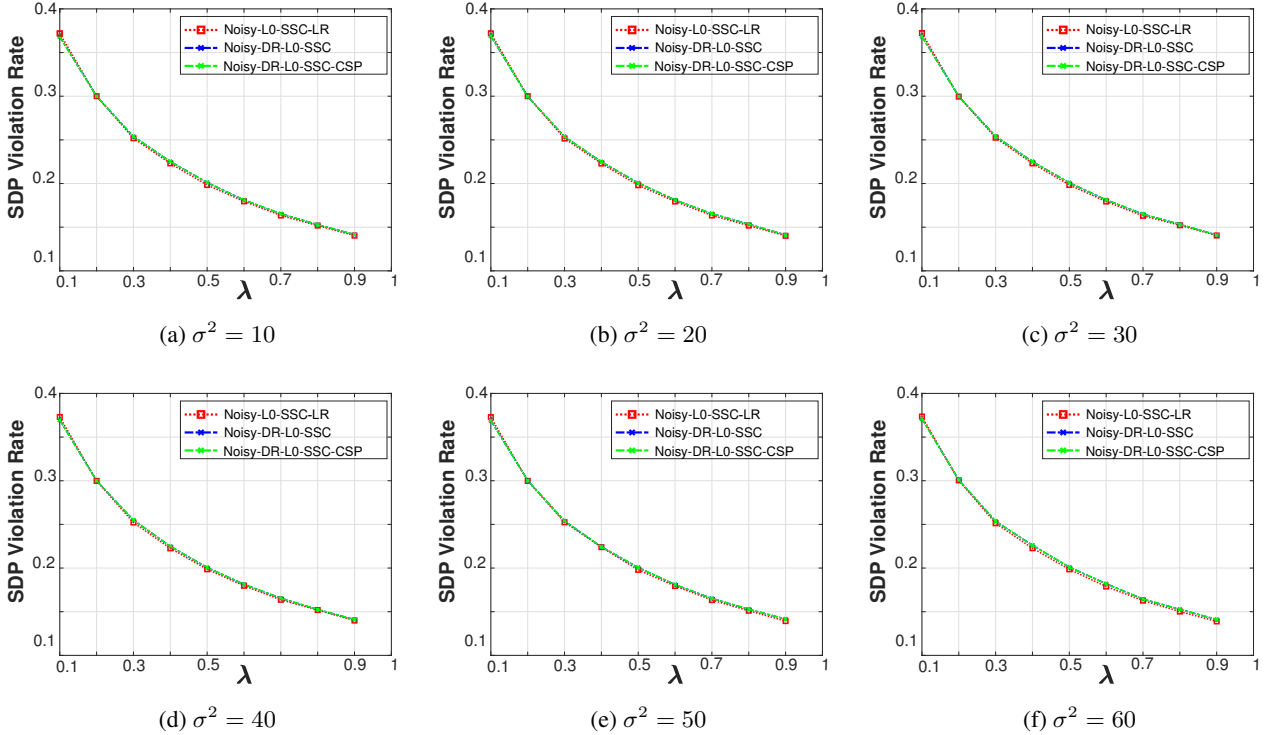

Figure 2: The SDP violation rate with respect to  $\lambda$  for noisy  $\ell^0$ -SSC, Noisy-DR- $\ell^0$ -SSC and Noisy-DR- $\ell^0$ -SSC-CSP. The SDP violation rate for Noisy-DR- $\ell^0$ -SSC and that for Noisy-DR- $\ell^0$ -SSC-CSP are the same, so their curves overlap each other.



## REFERENCES

- G. Aubrun and S.J. Szarek. *Alice and Bob Meet Banach: The Interface of Asymptotic Geometric Analysis and Quantum Information Theory*. Mathematical Surveys and Monographs. American Mathematical Society, 2017.
- Yanmei Chen, Xiao Shan Chen, and Wen Li. On perturbation bounds for orthogonal projections. *Numer. Algorithms*, 73(2):433–444, 2016.
- K. Davidson and S. Szarek. Local operator theory, random matrices and Banach spaces. In Lindenstrauss, editor, *Handbook on the Geometry of Banach spaces*, volume 1, pages 317–366. Elsevier Science, 2001.
- N. Halko, P. G. Martinsson, and J. A. Tropp. Finding structure with randomness: Probabilistic algorithms for constructing approximate matrix decompositions. *SIAM Rev.*, 53(2):217–288, May 2011. ISSN 0036-1445.
- B. Laurent and P. Massart. Adaptive estimation of a quadratic functional by model selection. *The Annals of Statistics*, 28(5):1302 – 1338, 2000.
- G. W. Stewart. On the perturbation of pseudo-inverses, projections and linear least squares problems. *SIAM Rev.*, 19(4):634–662, 1977.
- H. Weyl. Das asymptotische verteilungsgesetz der eigenwerte linearer partieller differentialgleichungen (mit einer anwendung auf die theorie der hohlraumstrahlung). *Mathematische Annalen*, 71:441–479, 1912.
- Yingzhen Yang and Jiahui Yu. Fast proximal gradient descent for A class of non-convex and non-smooth sparse learning problems. In *Proceedings of the Thirty-Fifth Conference on Uncertainty in Artificial Intelligence (UAI)*, pages 1253–1262, Tel Aviv, Israel, 2019.
- Yingzhen Yang, Jiashi Feng, Nebojsa Jojic, Jianchao Yang, and Thomas S Huang. On the suboptimality of proximal gradient descent for  $\ell^0$  sparse approximation. *arXiv preprint arXiv:1709.01230*, 2017.
