# Supplementary material
Source: ML conference proceedings conference paper supplement (https://openreview.net/forum?id=BnzMjDLs5e9)

**SDP Violation Rate**

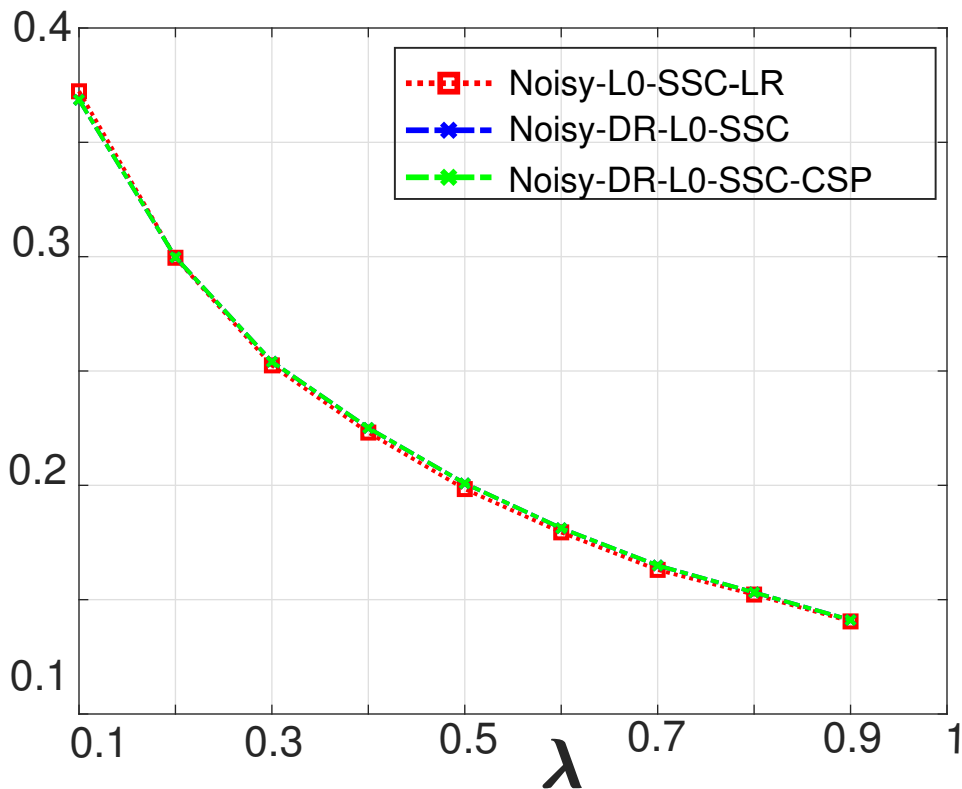

Supplement: supplementary_material [file attachment]

NMI w.r.t.  $\lambda$  on the Extended Yale-B Data

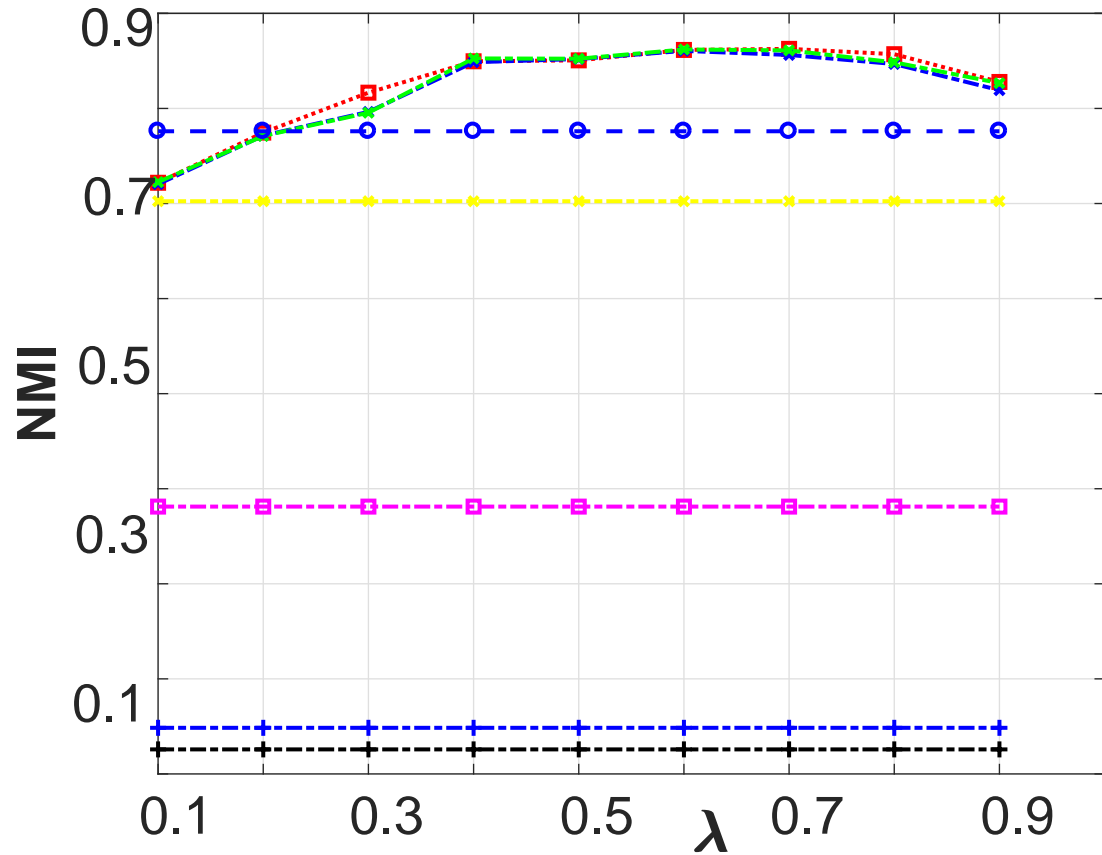

Supplement: supplementary_material [file attachment]

# SDP Violation Rate

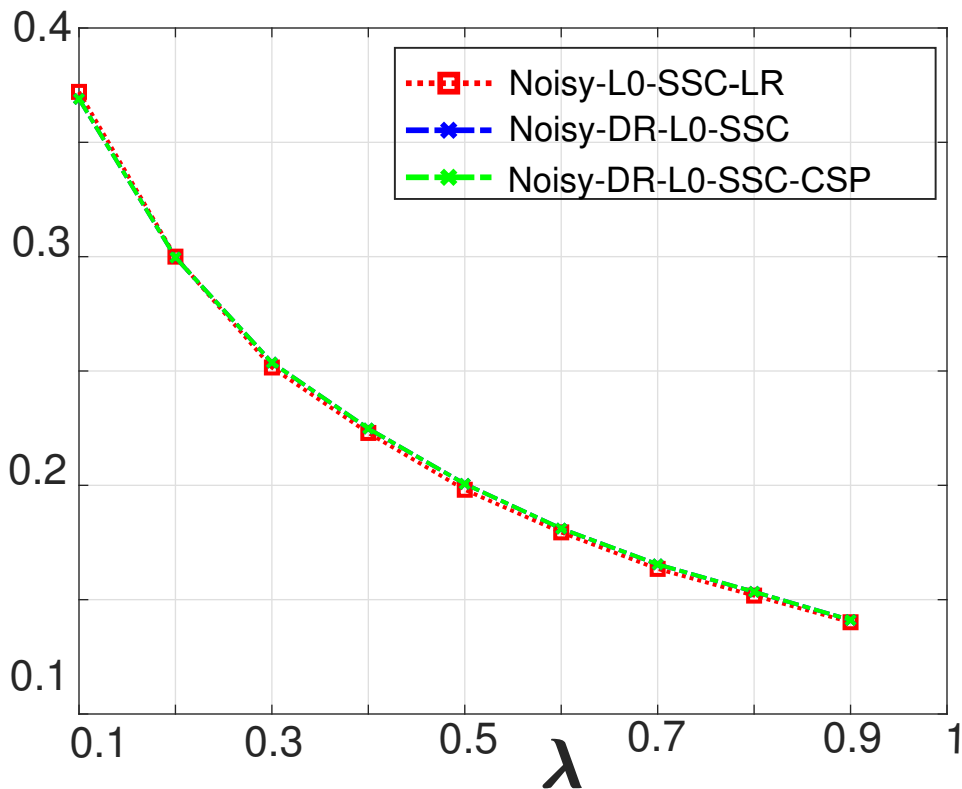

Supplement: supplementary_material [file attachment]

**SDP Violation Rate**

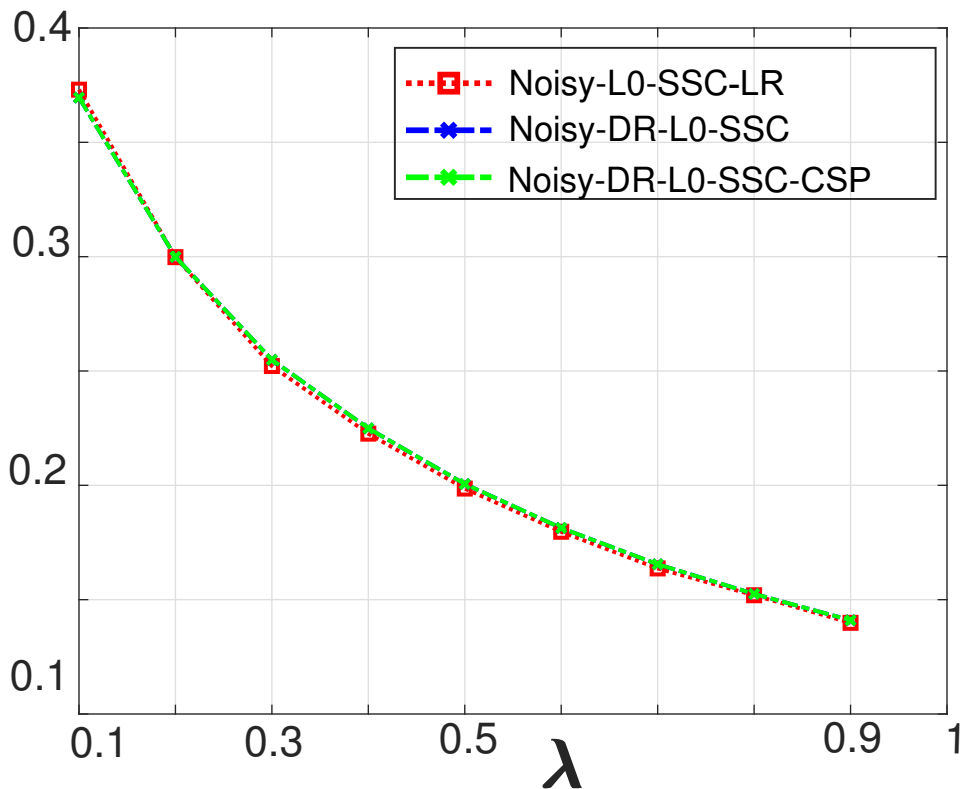

Supplement: supplementary_material [file attachment]

**SDP Violation Rate**

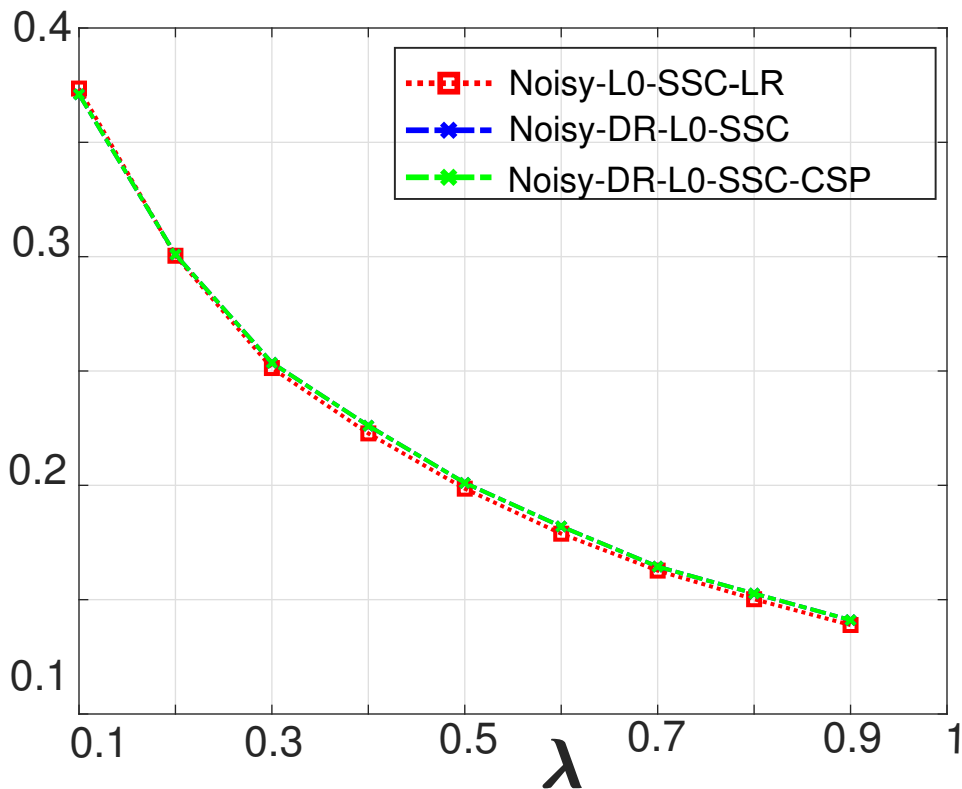

Supplement: supplementary_material [file attachment]

Accuracy w.r.t.  $\lambda$  on the Extended Yale-B Data

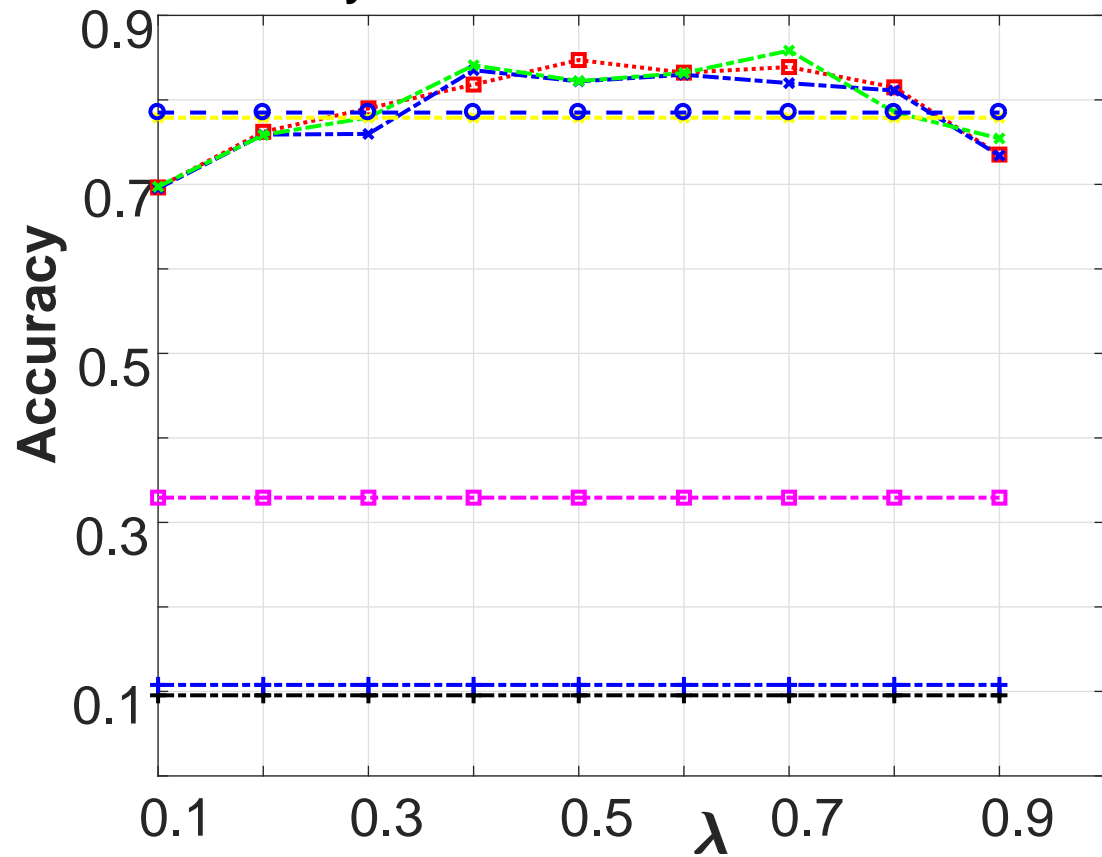

Supplement: supplementary_material [file attachment]

**SDP Violation Rate**

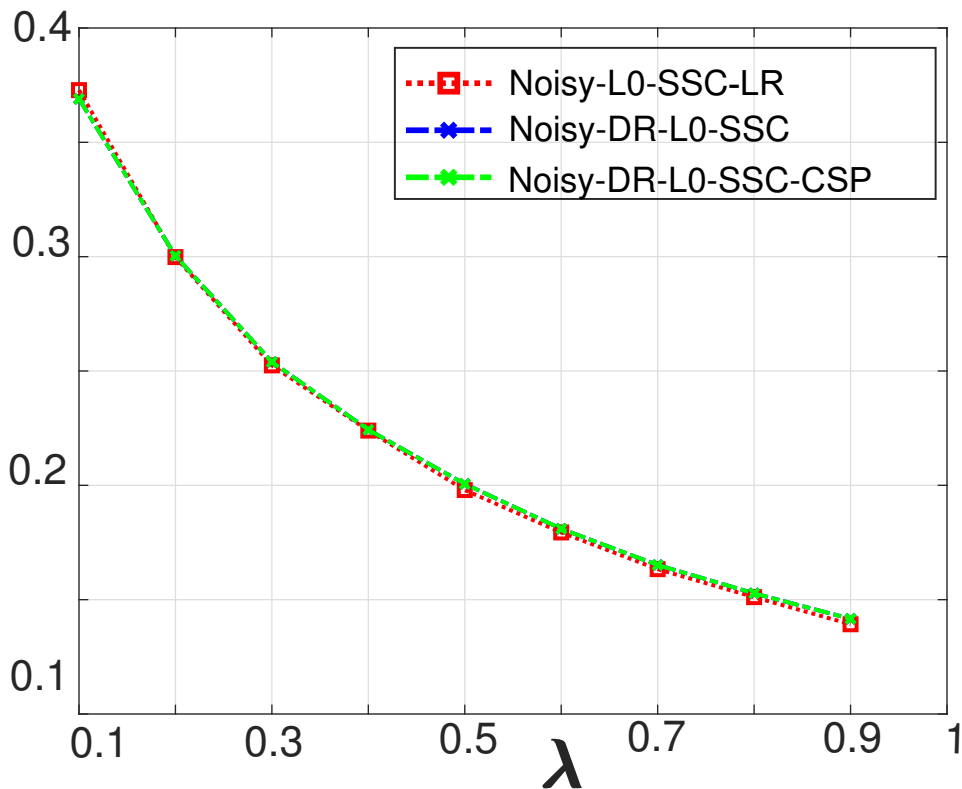

Supplement: supplementary_material [file attachment]

# SDP Violation Rate

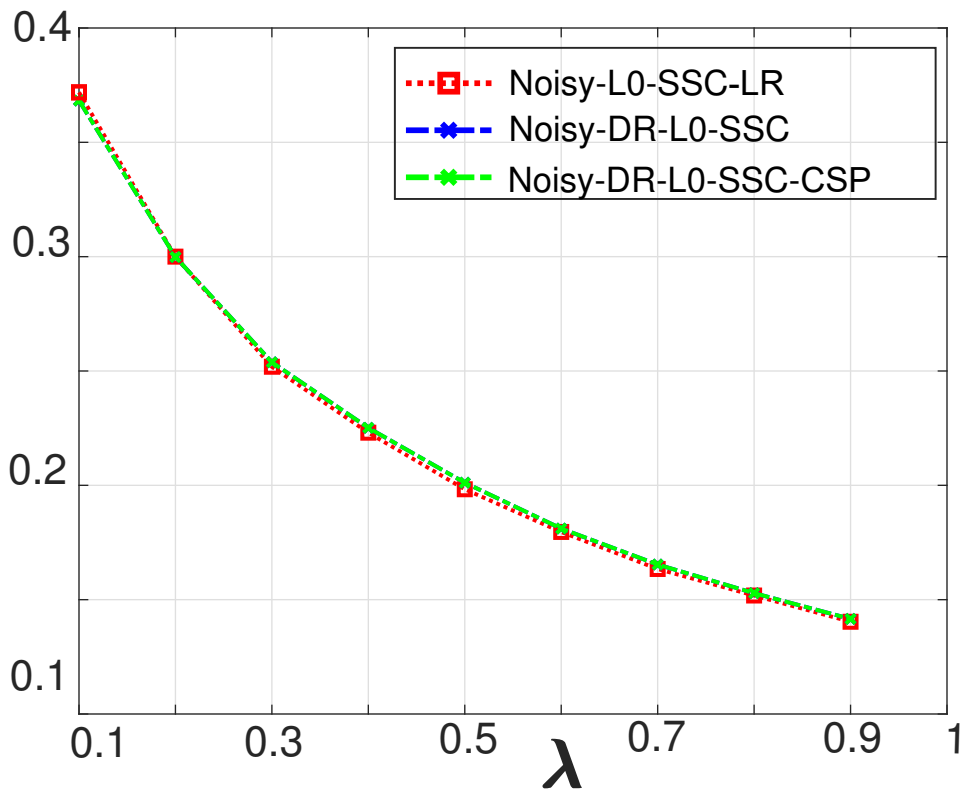

Supplement: supplementary_material [file attachment]

...... Noisy L0-SSC

—— Noisy-DR-L0-SSC-LR

—— Noisy-DR-L0-SSC-CSP

—— KM

—— SC

—— SMCE

—— SSC-OMP

—— Noisy SSC

Supplement: supplementary_material [file attachment]
